# Supplementary material for: Structural feature evolution – from fluids to the solid phase – and crystal morphology study of LASSBio 1601: a cyclohexyl-N-acylhydrazone derivative
Source: Royal Society of Chemistry journal article supplement (doi:10.1039/c5ra02696b), 2015-01-01
Supplement: c5ra02696b1.pdf [file c5ra02696b1.pdf]

## **Structural features evolution – from fluids to solid phase – and crystal morphology study of LASSBio 1601: a cyclohexyl- N-acetylhydrazone derivative**

Fanny Nascimento Costa,<sup>a</sup> Tiago F. da Silva,<sup>b,c</sup> Eduardo Miguez B. Silva,<sup>d</sup> Regina C. R.

Barroso,<sup>e</sup> Delson Braz,<sup>f</sup> Eliezer J. Barreiro,<sup>b,c</sup> Lídia Moreira Lima,<sup>b,c</sup> Francesco Punzo<sup>g</sup> and

Fabio Furlan Ferreira<sup>a\*</sup>

<sup>a</sup> Centro de Ciências Naturais e Humanas (CCNH), Universidade Federal do ABC (UFABC), Av. dos Estados, 5001, Santo André, SP, Brazil.

<sup>b</sup> LASSBio, Institute of Biomedical Sciences, Federal University of Rio de Janeiro (UFRJ), Av. Carlos Chagas Filho, 373, Rio de Janeiro, RJ, Brazil.

<sup>c</sup> Postgraduate Program of Chemistry, Institute of Chemistry, Federal University of Rio de Janeiro (UFRJ), Rio de Janeiro, RJ, Brazil.

<sup>d</sup> Macromolecules Institute (IMA), Federal University of Rio de Janeiro (UFRJ), Rio de Janeiro, RJ, Brazil.

<sup>e</sup> Physics Institute, State University of Rio de Janeiro (UERJ), Rio de Janeiro, RJ, Brazil.

<sup>f</sup> Program of Nuclear Engineering (PEN/COPPE), Federal University of Rio de Janeiro (UFRJ), Rio de Janeiro, RJ, Brazil.

<sup>g</sup> Dipartimento di Scienze del Farmaco, Sezione Chimica, Università degli Studi di Catania, Catania 95125, Italy

## Supporting Information

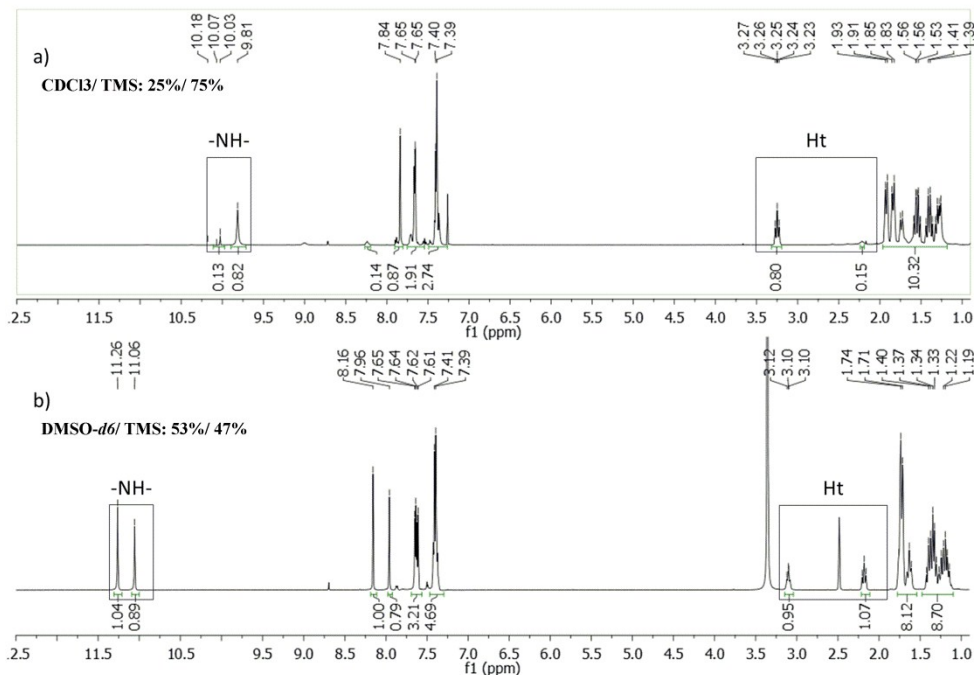

**Figure S1.** Change in signal integration at  $^1\text{H-NMR}$  (200 MHz) spectra of LASSBio-1601 solvent induced, using (a)  $\text{CDCl}_3/\text{TMS}$  and (b)  $\text{DMSO-}d_6/\text{TMS}$ . The hydrogen attached to the tertiary carbon of the cyclohexyl subunit (Ht) and hydrogen attached to nitrogen amide (-NH-) are highlighted.

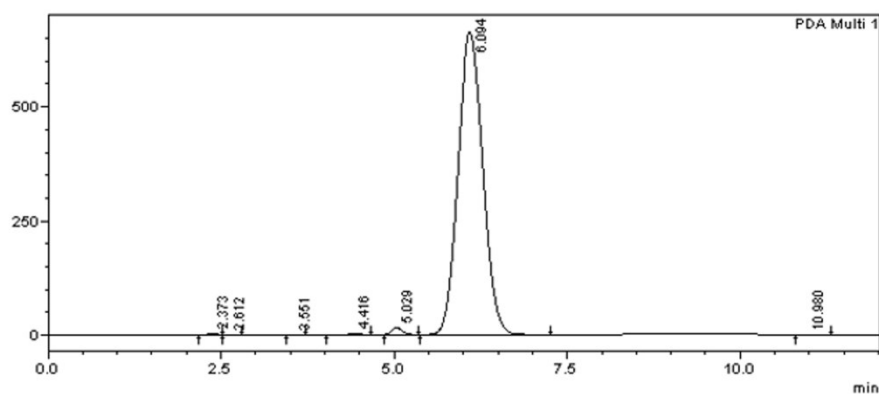

**Figure S2.** LASSBio-1601 chromatogram by internal normalization with 98,90% of area. Kromasil column 100-5-C18 (4.6 mm x 250 mm); detector SPD-M20A (Diode Array); 254 nm;  $1\text{ mL min}^{-1}$ ; injection of  $20\ \mu\text{L}$ ; 70/30 ACN/ $\text{H}_2\text{O}$ .

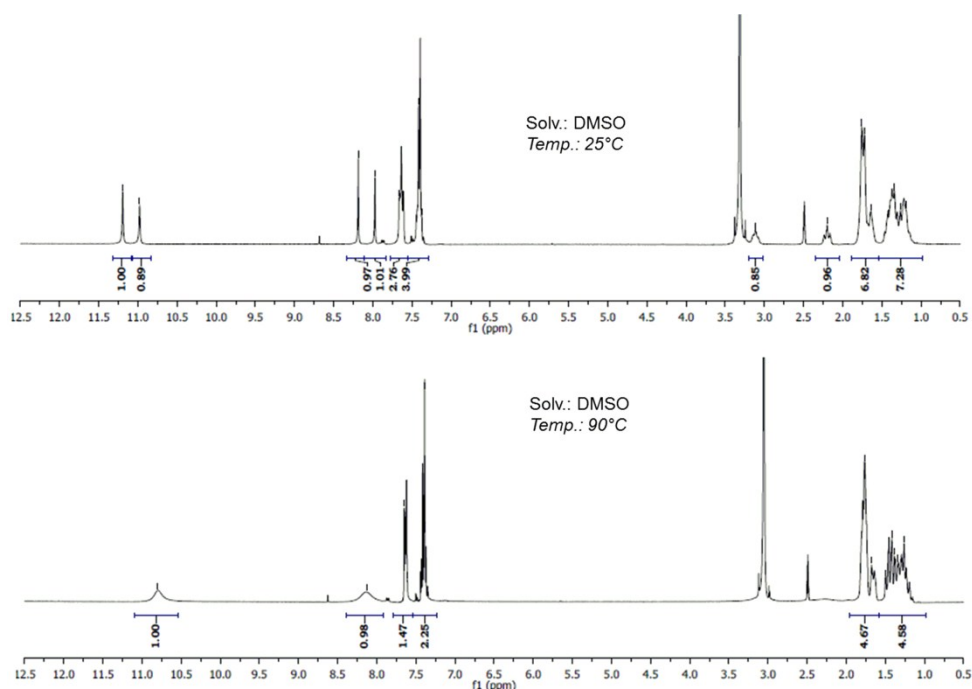

**Figure S3.** LASSBio-1601  $^1\text{H}$ -NMR spectra at 25 °C and 90 °C (300 MHz, DMSO- $d_6$ /TMS) showing the coalescence of signals that were previously duplicated.

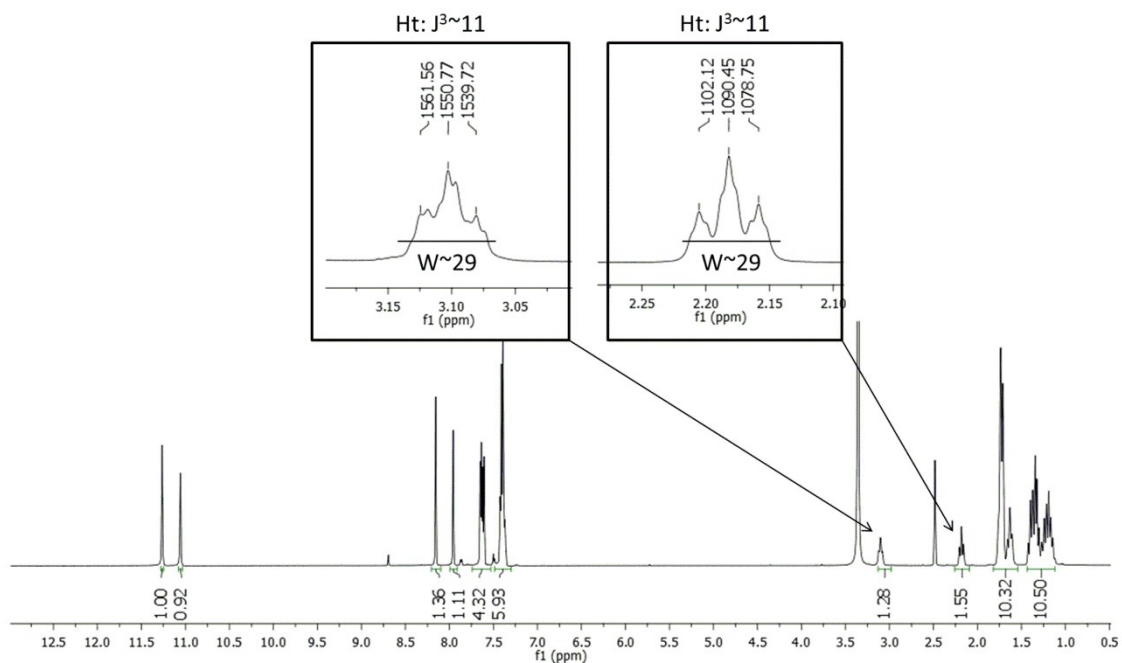

**Figure S4.**  $^1\text{H}$ -NMR Spectra of the LASSBio-1601 compound including the H-H couplings (500 MHz, DMSO- $d_6$ /TMS).

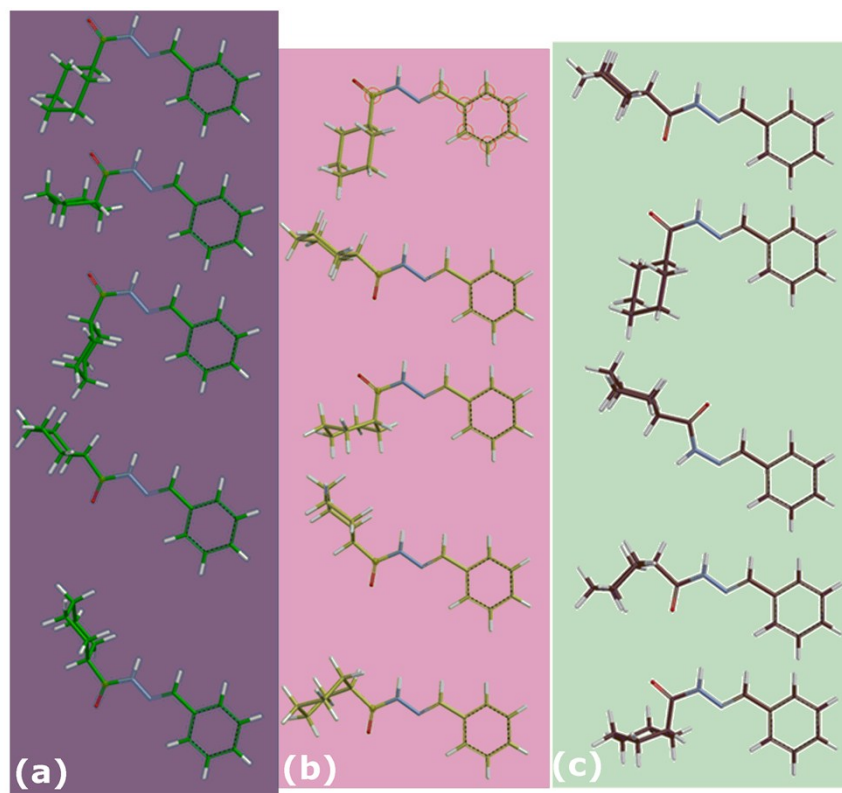

**Figure S5.** The five more stable conformers of LASSBio-1601 compound (*in Silico*) in different solvents – (a) vacuum, (b) DMSO and (c) water.

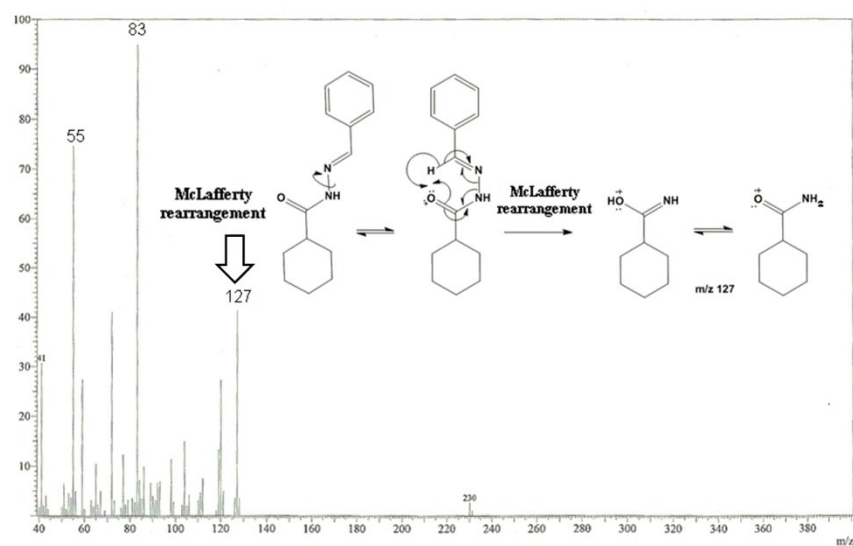

**Figure S6.** Mass spectrum of LASSBio-1601 showing a McLafferty rearrangement exclusive of relative configuration *E*.

**Table S1.** Final coordinates and equivalent isotropic displacement parameters ( $U_{\text{iso}} = B_{\text{iso}}/8\pi^2$ ) for all atoms in the LASSBio-1601 crystal structure.

| Atom  | <i>x</i>  | <i>y</i>  | <i>z</i>    | $U_{\text{iso}}$ (Å <sup>2</sup> ) |
|-------|-----------|-----------|-------------|------------------------------------|
| C(1)  | 0.780(5)  | 0.547(4)  | 0.357(2)    | 0.03812                            |
| C(2)  | 0.605(5)  | 0.591(3)  | 0.2555(18)  | 0.03812                            |
| O(3)  | 0.943(3)  | 0.444(2)  | 0.4055(12)  | 0.03812                            |
| N(4)  | 0.724(3)  | 0.617(2)  | 0.4004(18)  | 0.03812                            |
| C(5)  | 0.741(4)  | 0.745(3)  | 0.1603(15)  | 0.03812                            |
| C(6)  | 0.595(5)  | 0.458(2)  | 0.2466(18)  | 0.03812                            |
| N(8)  | 0.527(3)  | 0.724(2)  | 0.3512(16)  | 0.03812                            |
| C(10) | 0.592(4)  | 0.788(3)  | 0.0529(16)  | 0.03812                            |
| C(13) | 0.449(4)  | 0.503(3)  | 0.1392(15)  | 0.03812                            |
| C(16) | 0.501(4)  | 0.785(3)  | 0.397(2)    | 0.03812                            |
| C(17) | 0.585(4)  | 0.654(2)  | 0.0450(15)  | 0.03812                            |
| C(22) | 0.305(5)  | 0.907(4)  | 0.350(2)    | 0.03812                            |
| C(26) | 0.185(4)  | 0.977(3)  | 0.2462(19)  | 0.03812                            |
| C(27) | 0.270(4)  | 0.964(3)  | 0.4053(16)  | 0.03812                            |
| C(28) | -0.001(4) | 1.092(3)  | 0.2009(18)  | 0.03812                            |
| C(30) | 0.078(4)  | 1.075(3)  | 0.3632(18)  | 0.03812                            |
| C(32) | -0.057(4) | 1.140(3)  | 0.2604(19)  | 0.03812                            |
| H(7)  | 0.422(5)  | -0.389(3) | -0.7468(18) | 0.04574                            |
| H(9)  | 0.802(3)  | -0.420(2) | -0.5338(18) | 0.04574                            |
| H(11) | 0.929(4)  | -0.261(3) | -0.8348(15) | 0.04574                            |
| H(12) | 0.693(4)  | -0.176(3) | -0.8370(15) | 0.04574                            |
| H(14) | 0.470(5)  | -0.628(2) | -0.6976(18) | 0.04574                            |
| H(15) | 0.769(5)  | -0.574(2) | -0.7439(18) | 0.04574                            |
| H(18) | 0.728(4)  | -0.134(3) | -0.9995(16) | 0.04574                            |

|       |           |           |             |         |
|-------|-----------|-----------|-------------|---------|
| H(19) | 0.421(4)  | -0.182(3) | -0.9607(16) | 0.04574 |
| H(20) | 0.245(4)  | -0.489(3) | -0.8656(15) | 0.04574 |
| H(21) | 0.457(4)  | -0.586(3) | -0.8638(15) | 0.04574 |
| H(23) | 0.601(4)  | -0.244(3) | -0.535(2)   | 0.04574 |
| H(24) | 0.764(4)  | -0.375(2) | -0.9536(15) | 0.04574 |
| H(25) | 0.467(4)  | -0.327(2) | -1.0170(15) | 0.04574 |
| H(29) | 0.232(4)  | -0.068(3) | -0.7888(19) | 0.04574 |
| H(31) | 0.338(4)  | -0.073(3) | -0.5233(16) | 0.04574 |
| H(33) | -0.077(4) | 0.129(3)  | -0.8716(18) | 0.04574 |
| H(34) | 0.028(4)  | 0.124(3)  | -0.6075(18) | 0.04574 |
| H(35) | -0.178(4) | 0.224(3)  | -0.7806(19) | 0.04574 |

**Table S2.** Some selected bond distances for LASSBio-1601.

| Bonds       | Lengths (Å) |
|-------------|-------------|
| C(1)-C(2)   | 1.50(4)     |
| C(1)-O(3)   | 1.22(4)     |
| C(1)-N(4)   | 1.37(6)     |
| C(2)-C(5)   | 1.54(3)     |
| C(2)-C(6)   | 1.52(5)     |
| N(4)-N(8)   | 1.37(2)     |
| C(5)-C(10)  | 1.53(3)     |
| C(6)-C(13)  | 1.52(3)     |
| N(8)-C(16)  | 1.27(5)     |
| C(10)-C(17) | 1.53(5)     |
| C(13)-C(17) | 1.52(2)     |
| C(16)-C(22) | 1.47(4)     |
| C(22)-C(26) | 1.38(4)     |
| C(22)-C(27) | 1.38(6)     |

|             |         |
|-------------|---------|
| C(26)-C(28) | 1.39(4) |
| C(27)-C(30) | 1.39(4) |
| C(28)-C(32) | 1.40(5) |
| C(30)-C(32) | 1.40(3) |

---

**Table S3.** Some selected bond angles for LASSBio-1601.

| Bonds             | Angles (°) |
|-------------------|------------|
| C(2)-C(1)-O(3)    | 123(3)     |
| C(2)-C(1)-N(4)    | 116(3)     |
| O(3)-C(1)-N(4)    | 120(3)     |
| C(1)-C(2)-C(5)    | 109(2)     |
| C(1)-C(2)-C(6)    | 108(2)     |
| C(5)-C(2)-C(6)    | 112(2)     |
| C(1)-N(4)-N(8)    | 121(2)     |
| C(2)-C(5)-C(10)   | 111(2)     |
| C(2)-C(6)-C(13)   | 111(2)     |
| N(4)-N(8)-C(16)   | 115(2)     |
| C(5)-C(10)-C(17)  | 111(2)     |
| C(6)-C(13)-C(17)  | 112(2)     |
| N(8)-C(16)-C(22)  | 121(3)     |
| C(10)-C(17)-C(13) | 111(2)     |
| C(16)-C(22)-C(26) | 120(3)     |
| C(16)-C(22)-C(27) | 119(3)     |
| C(26)-C(22)-C(27) | 120(3)     |
| C(22)-C(26)-C(28) | 121(3)     |
| C(22)-C(27)-C(30) | 120(3)     |
| C(26)-C(28)-C(32) | 119(2)     |

C(27)-C(30)-C(32) 120(2)

C(28)-C(32)-C(30) 120(2)

---
